# Supplementary material for: Transcriptional heterogeneity and cell cycle regulation as central determinants of Primitive Endoderm priming
Source: eLife journal article supplement (doi:10.7554/elife.78967), 2022-08-15
Supplement: figures [file elife-78967-figures-v2.pdf]

---

## Figures and figure supplements

Transcriptional heterogeneity and cell cycle regulation as central determinants of Primitive Endoderm priming

**Marta Perera *et al***

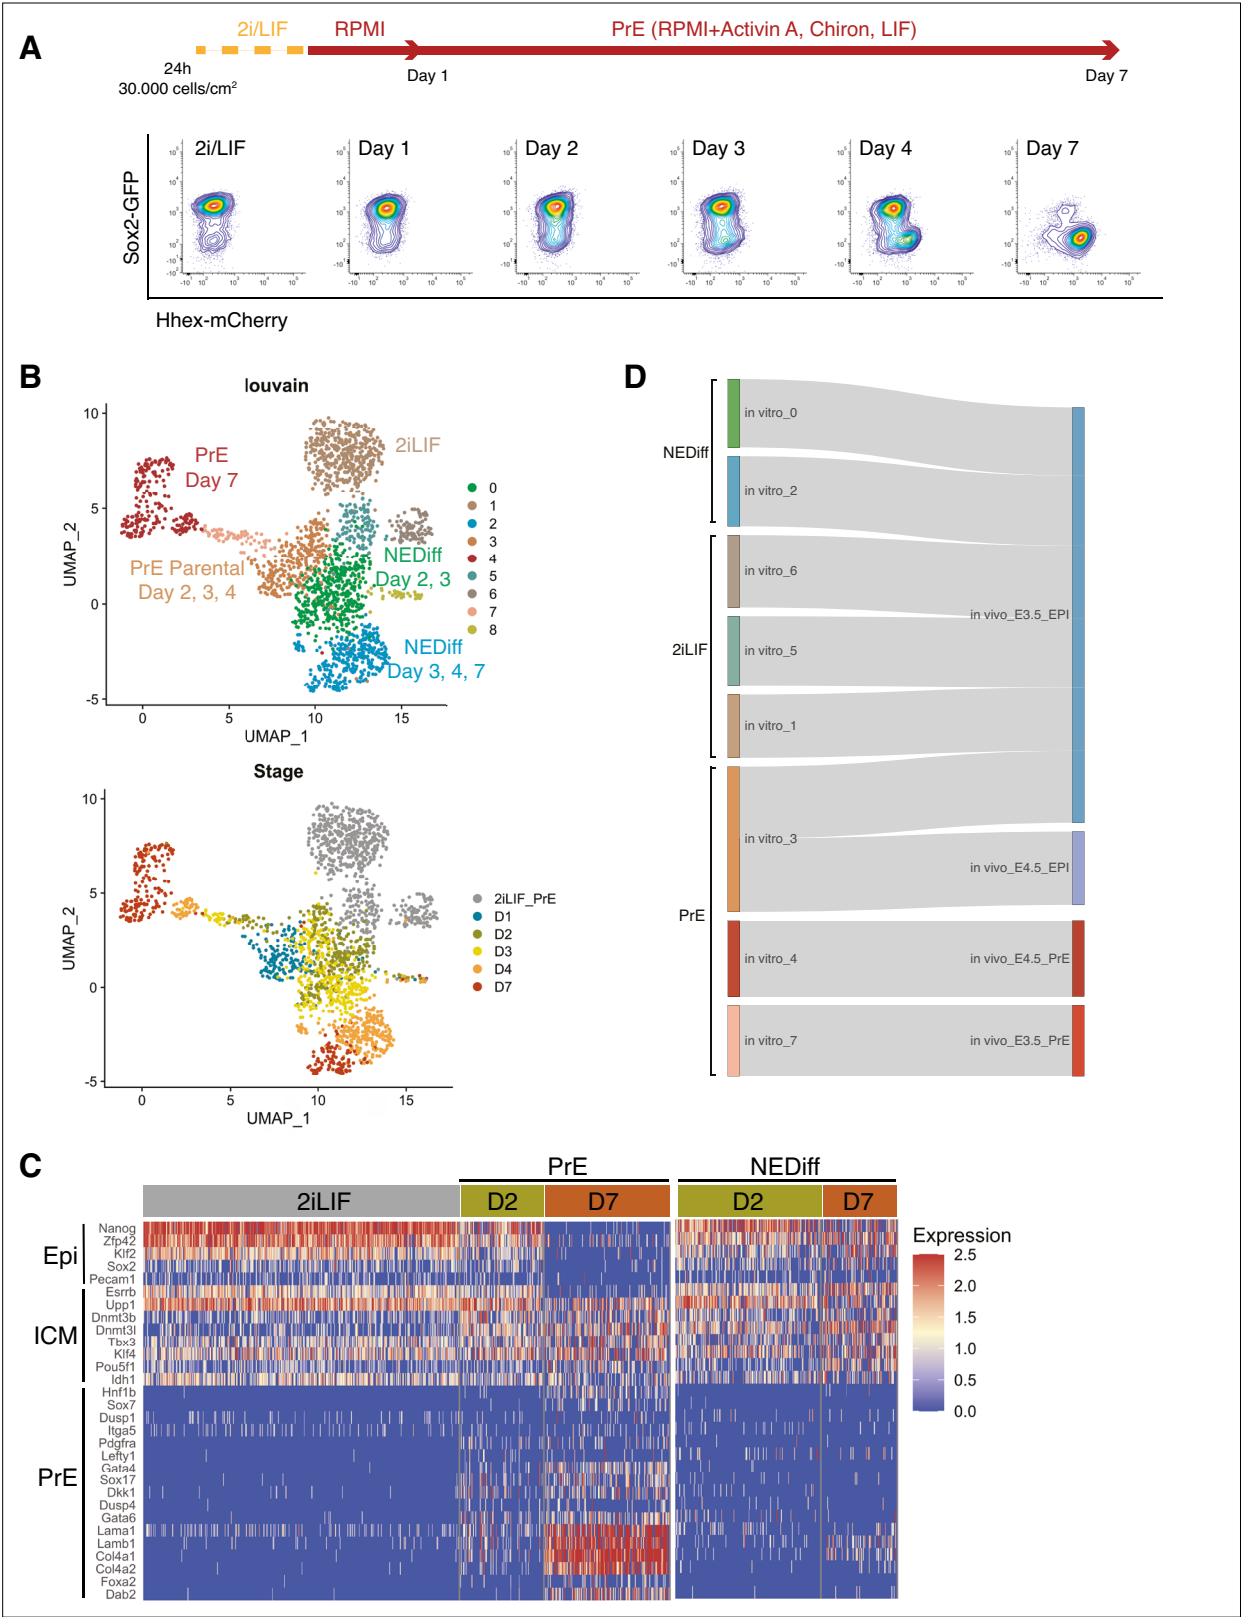

**Figure 1.** Transcriptome profiling of Primitive Endoderm (PrE) *in vitro* differentiation. **(A)** Schematic of the experiment. Cells were passaged twice in 2i/LIF and then plated in RPMI base media 24 hr before starting the experiment. Bottom panel: Flow cytometry plots showing the time points selected for single-cell RNA-seq. The fluorescent information of Sox2 and Hhex was recorded prior to sequencing. Cells from all the populations shown in the plots were collected for sequencing. **(B)** UMAP projection of the *in vitro* experiment showing nine identified clusters using Louvain (upper panel) and

Figure 1 continued on next page

## Figure 1 continued

stages of differentiation (bottom panel). **(C)** Heatmap showing expression of selected Epi, Inner Cell Mass (ICM), and PrE markers in 2i/LIF, days 2 and 7 of differentiation. Left panel: PrE Diff branch. Right panel: NEDiff branch. Cells at day 2 in the PrE branch already are upregulating endoderm genes while the NEDiff cells are not. **(D)** Sankey plot visualizing cluster similarity comparison between identified *in vitro* clusters and *in vivo* (**Nowotschin et al., 2019**) experiment using the Cluster Alignment Tool (CAT).

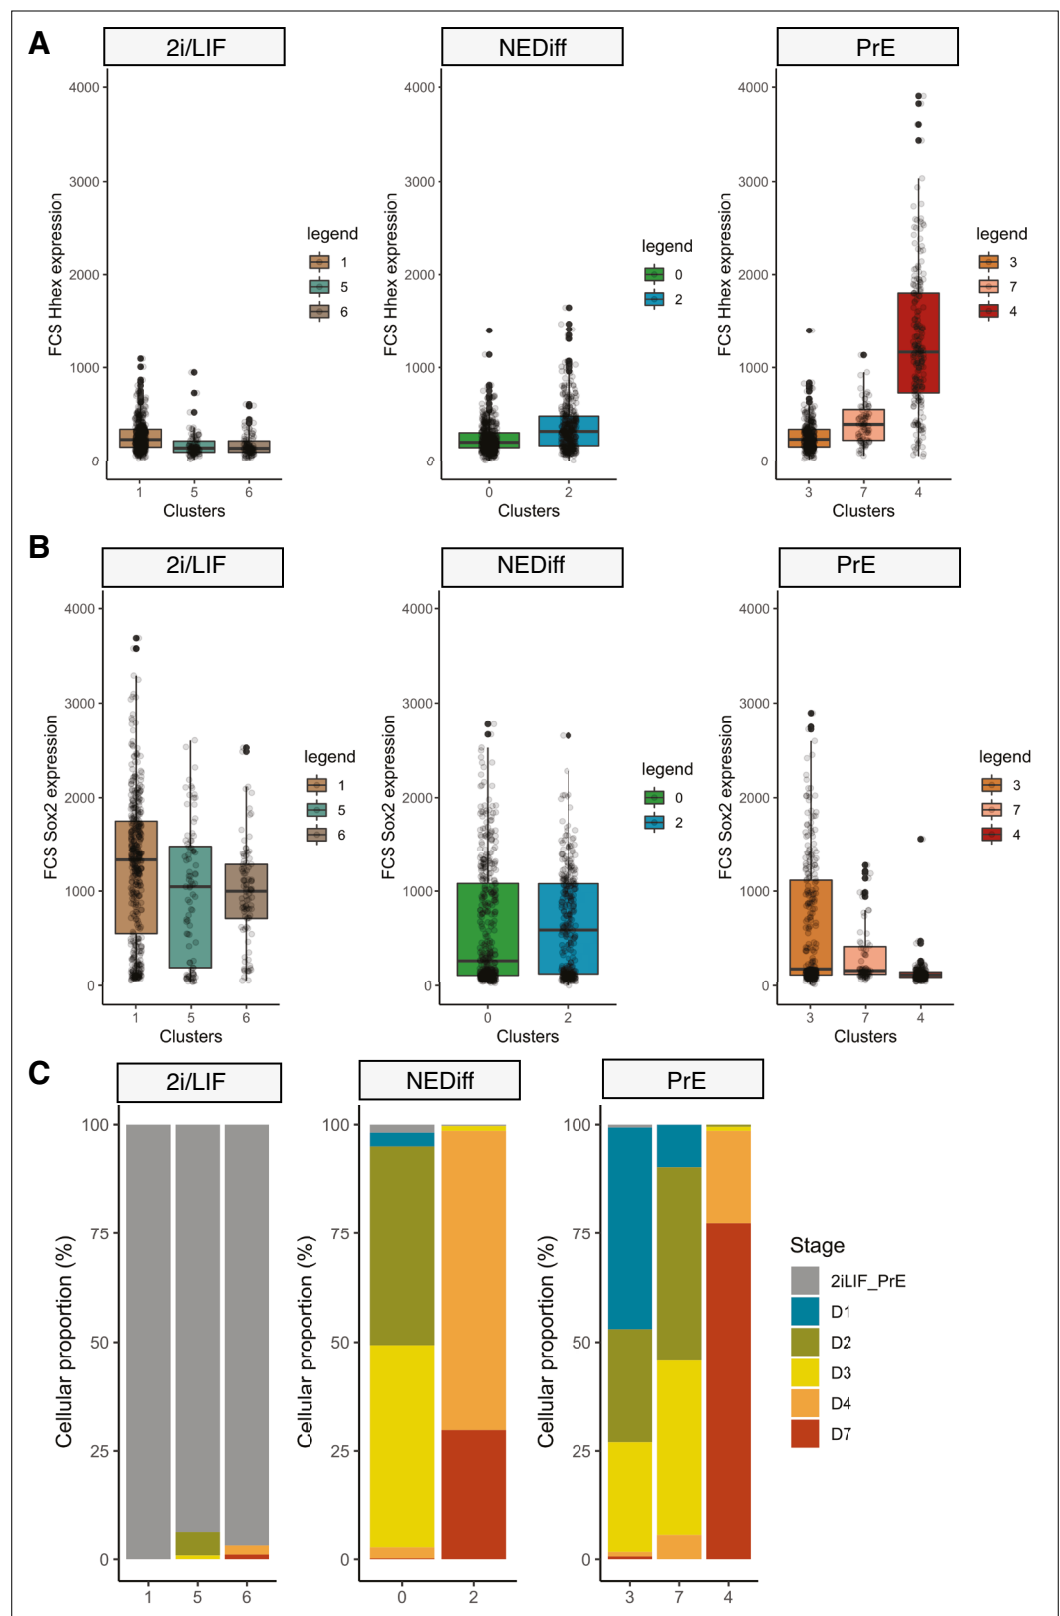

**Figure 1—figure supplement 1.** Properties of cells collected for MARS-seq during Primitive Endoderm (PrE) *in vitro* differentiation. **(A)** Fluorescence intensity on the Hhex-mCherry channel recorded by the FACS at the moment of the sample collection for sequencing. Samples were collected from 2i/LIF culture, and days 1, 2, 3, 4, and 7 of PrE differentiation. Cells are labelled PrE or NEDiff according to whether they belong to the PrE branch or the

Figure 1—figure supplement 1 continued on next page



*Figure 1—figure supplement 1 continued*

not differentiated branch, respectively. PrE cells show higher Hhex reporter expression than the NEDiff clusters.

**(B)** Fluorescence intensity on the Sox2-GFP channel recorded by FACS at the moment of the sample collection for sequencing. Samples were collected from 2i/LIF culture, and days 1, 2, 3, 4, and 7 of PrE differentiation. Cells are labelled PrE or NEDiff according to whether they belong to the PrE branch or the not differentiated branch, respectively. NEDiff cells show higher Sox2 reporter expression than the PrE clusters. **(C)** Cellular proportions of cells in 2i/LIF vs. NEDiff vs. PrE branch, showing that clusters 1, 5, and 6 belong to the 2i/LIF cells. Cells from days 2, 3, and 4 are separated between differentiated (PrE, clusters 3, 7, and 4) and non-differentiated (NEDiff, clusters 0 and 2).

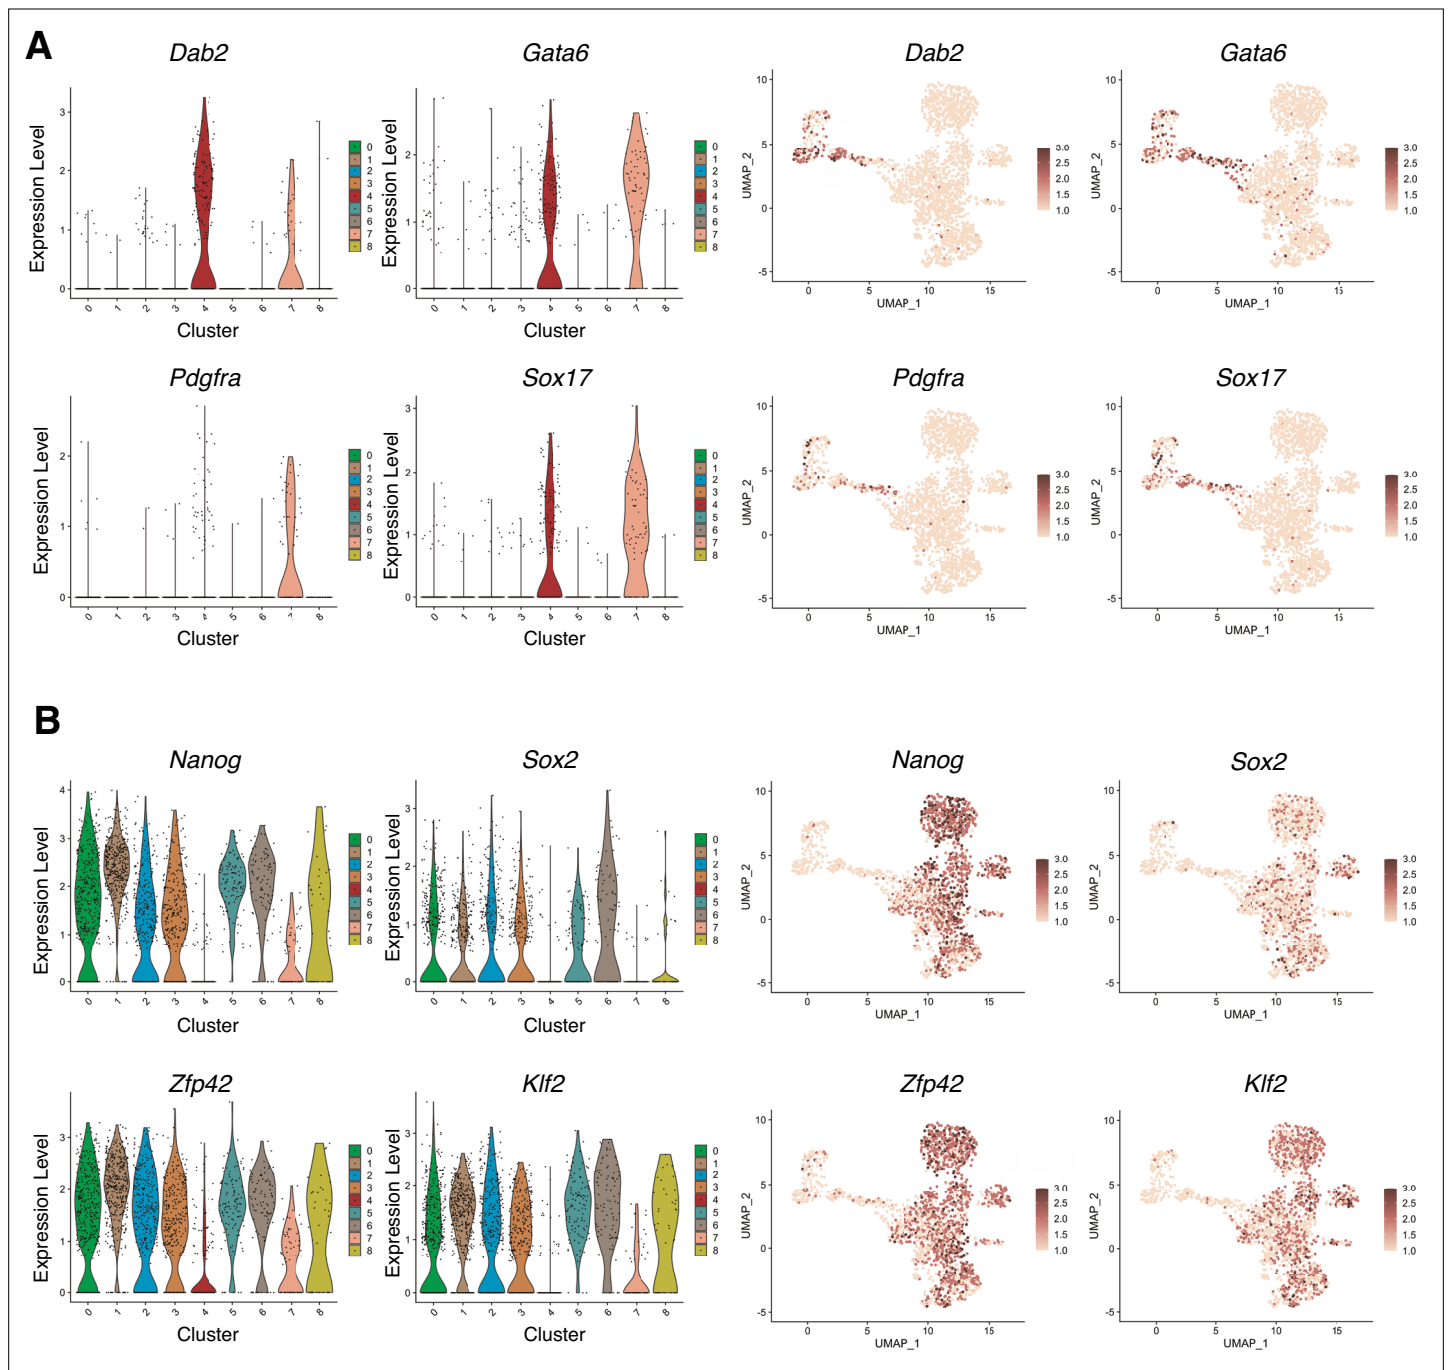

**Figure 1—figure supplement 2.** Lineage-specific markers expressed in single-cell RNA-seq clusters. **(A)** Interrogation of endodermal genes (*Dab2*, *Gata6*, *Pdgfra*, and *Sox17*), mostly expressed in the Primitive Endoderm (PrE) branch of the dataset. **(B)** Interrogation of Epiblast genes (*Nanog*, *Sox2*, *Zfp42*, and *Klf2*), mostly expressed in the 2i/LIF clusters and the NEDiff branch of the dataset.

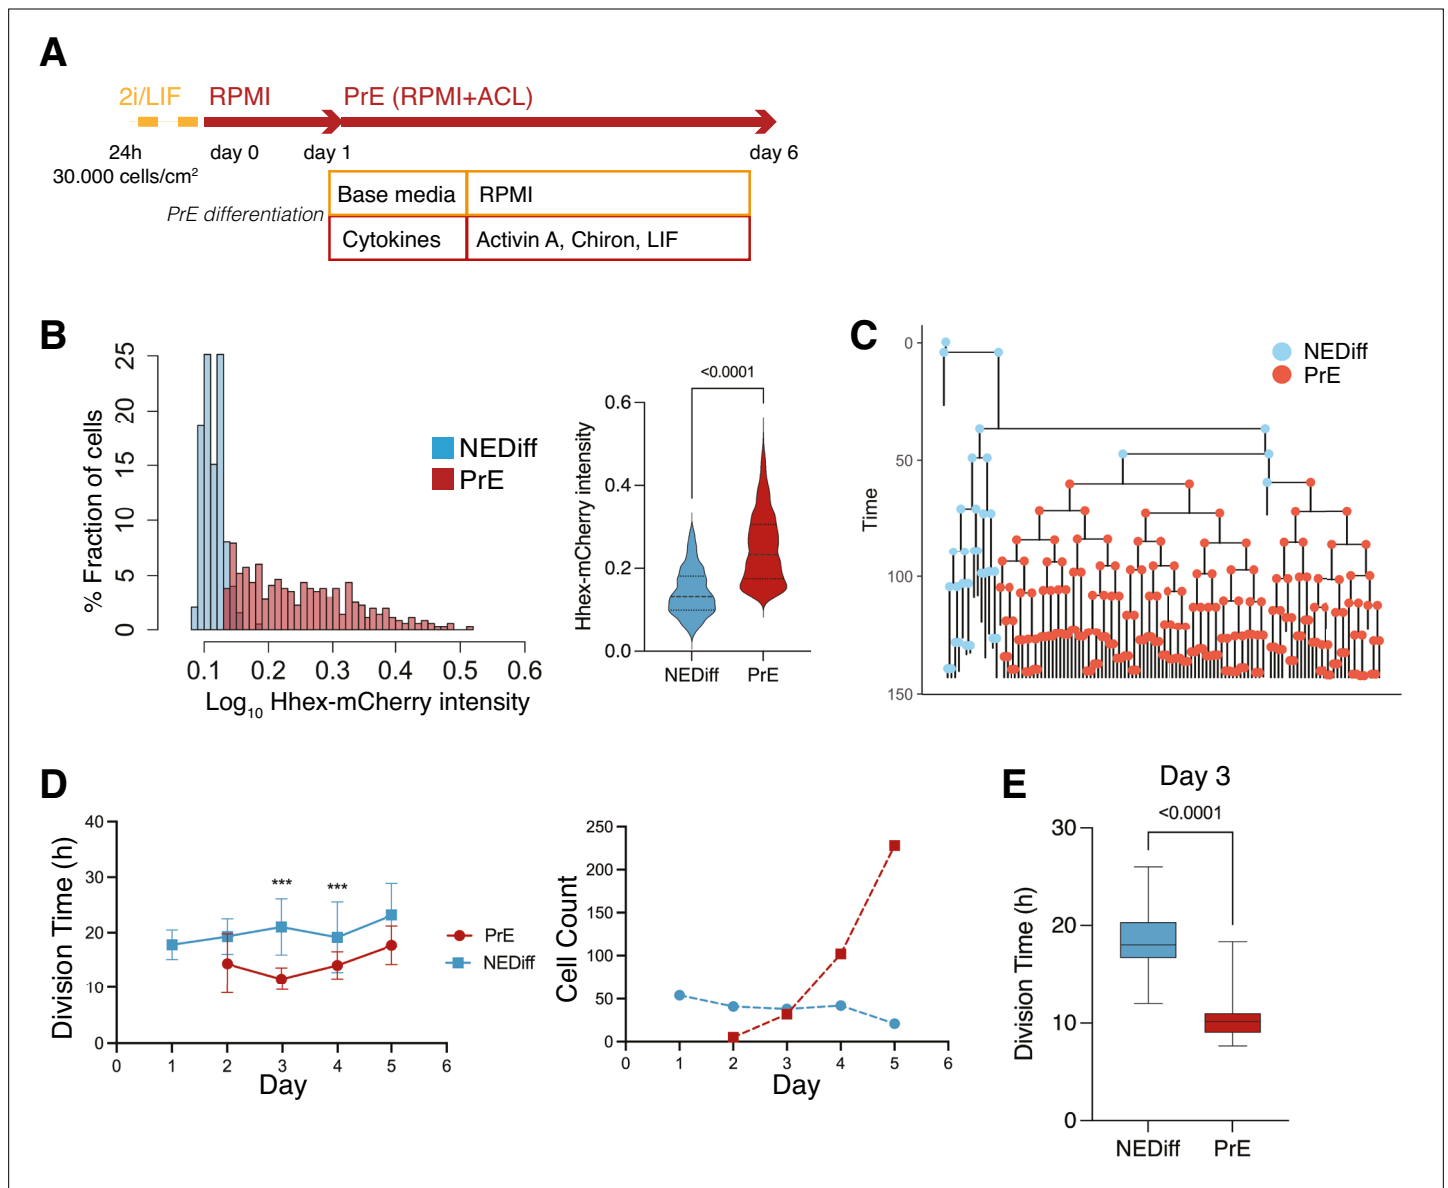

**Figure 2.** Time lapse of Primitive Endoderm (PrE) differentiation shows rapid proliferation of PrE-primed cells. **(A)** Schematic of the experimental setup. Cells were imaged for 6 days acquiring one time frame every 20 min. **(B)** The *Hhex* intensity distribution between the populations allowed us to separate PrE differentiated cells (PrE) from the Non-Endodermal/Non-Differentiated cells (NEDiff). p value <0.0001 Mann-Whitney test. **(C)** Example of a lineage tree showing how the PrE branch of the tree arises. The first and last generation were discarded from further analysis since the cell cycle information is not complete. All lineage trees collected in the PrE condition are shown in **Figure 2—figure supplement 1**; this example corresponds to Tree 10 in **Figure 2—figure supplement 1**. **(D)** Analysis of mouse embryonic stem cells (mESCs) division times and cell counts showed that cells that differentiate into PrE are dividing faster at the beginning of the differentiation process (day 3, left panel) and that selected survival likely takes place later in differentiation (days 4 and 5, right panel). \*\*\*p value <0.001. **(E)** Cell cycle length at day 3 shows a decrease in the PrE cells division time, compared to a slower dividing non-endodermal cluster (p value <0.0001 unpaired t-test).

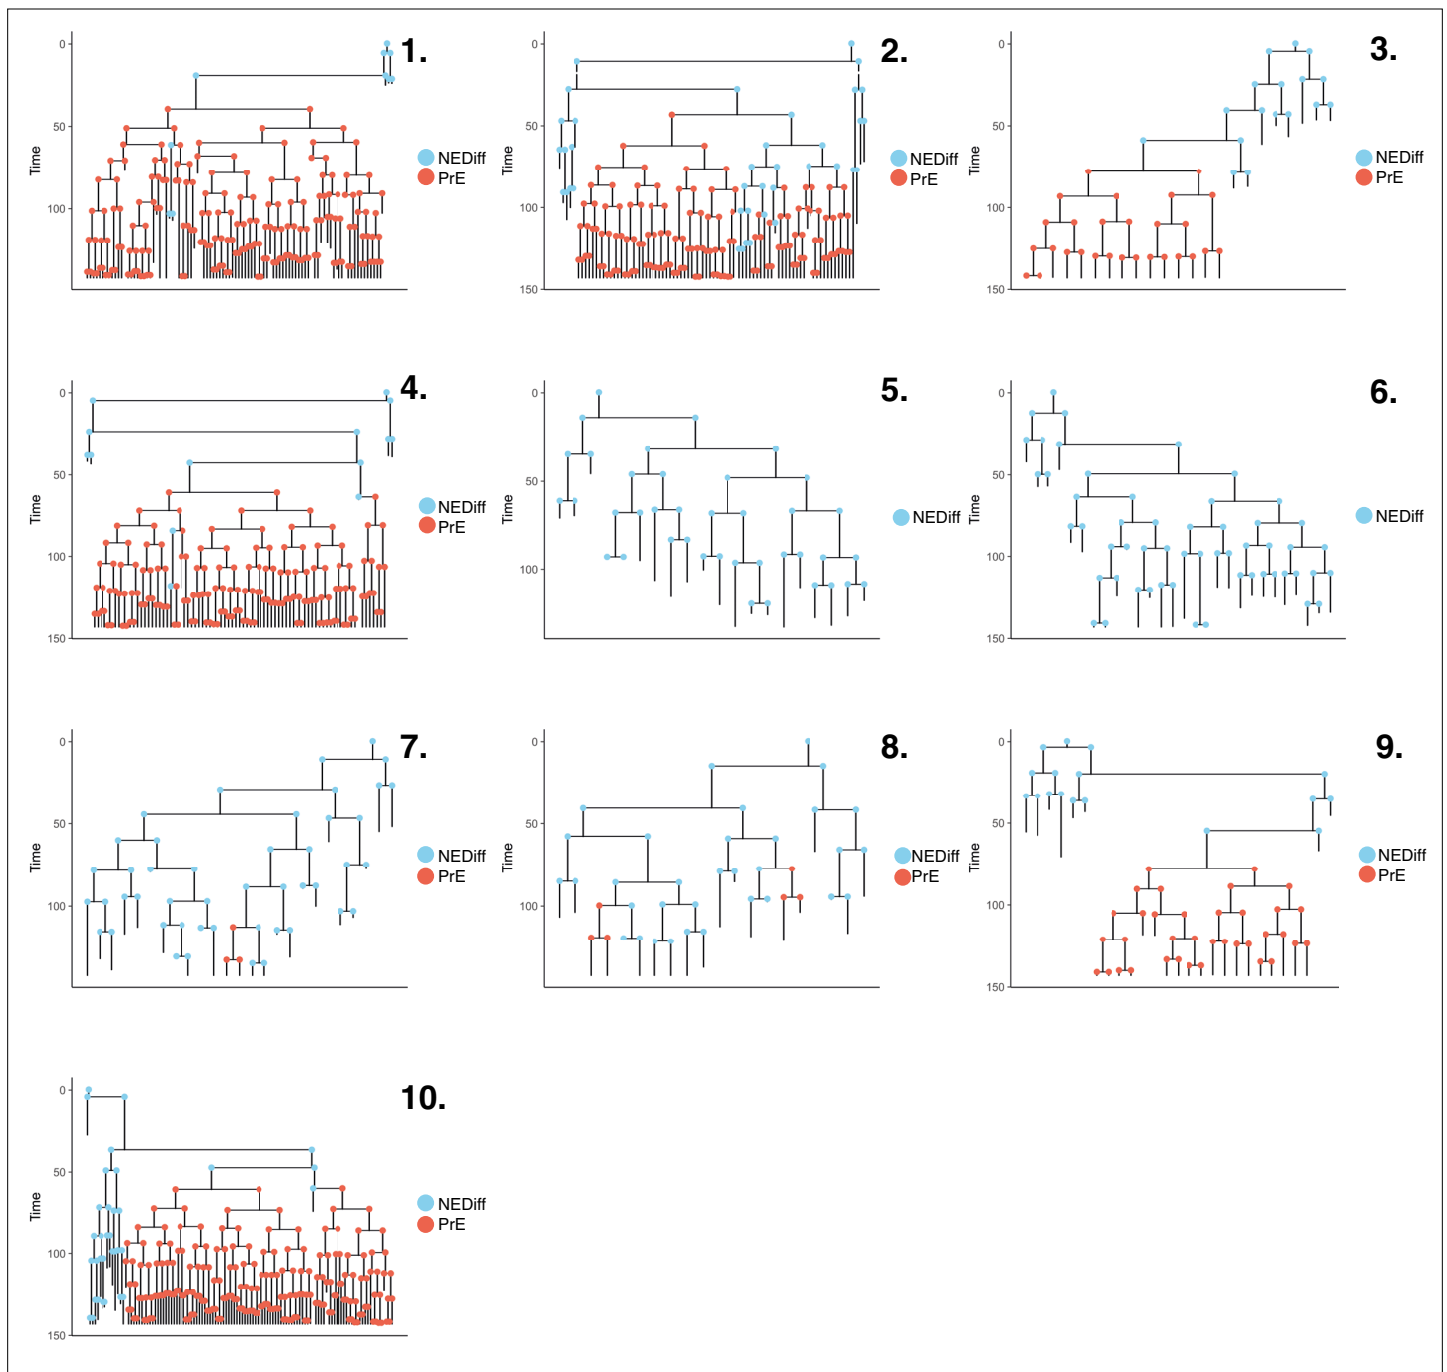

**Figure 2—figure supplement 1.** Lineage trees in Primitive Endoderm (PrE) differentiation. Lineage trees generated in the PrE dataset. We manually tracked 1158 cells. After constructing our lineage trees, cells that died or that had not completed a full division cycle were discarded. The final dataset consisted of 564 cells across 10 lineage trees. Cells are coloured based on clusters described in **Figure 2B**.

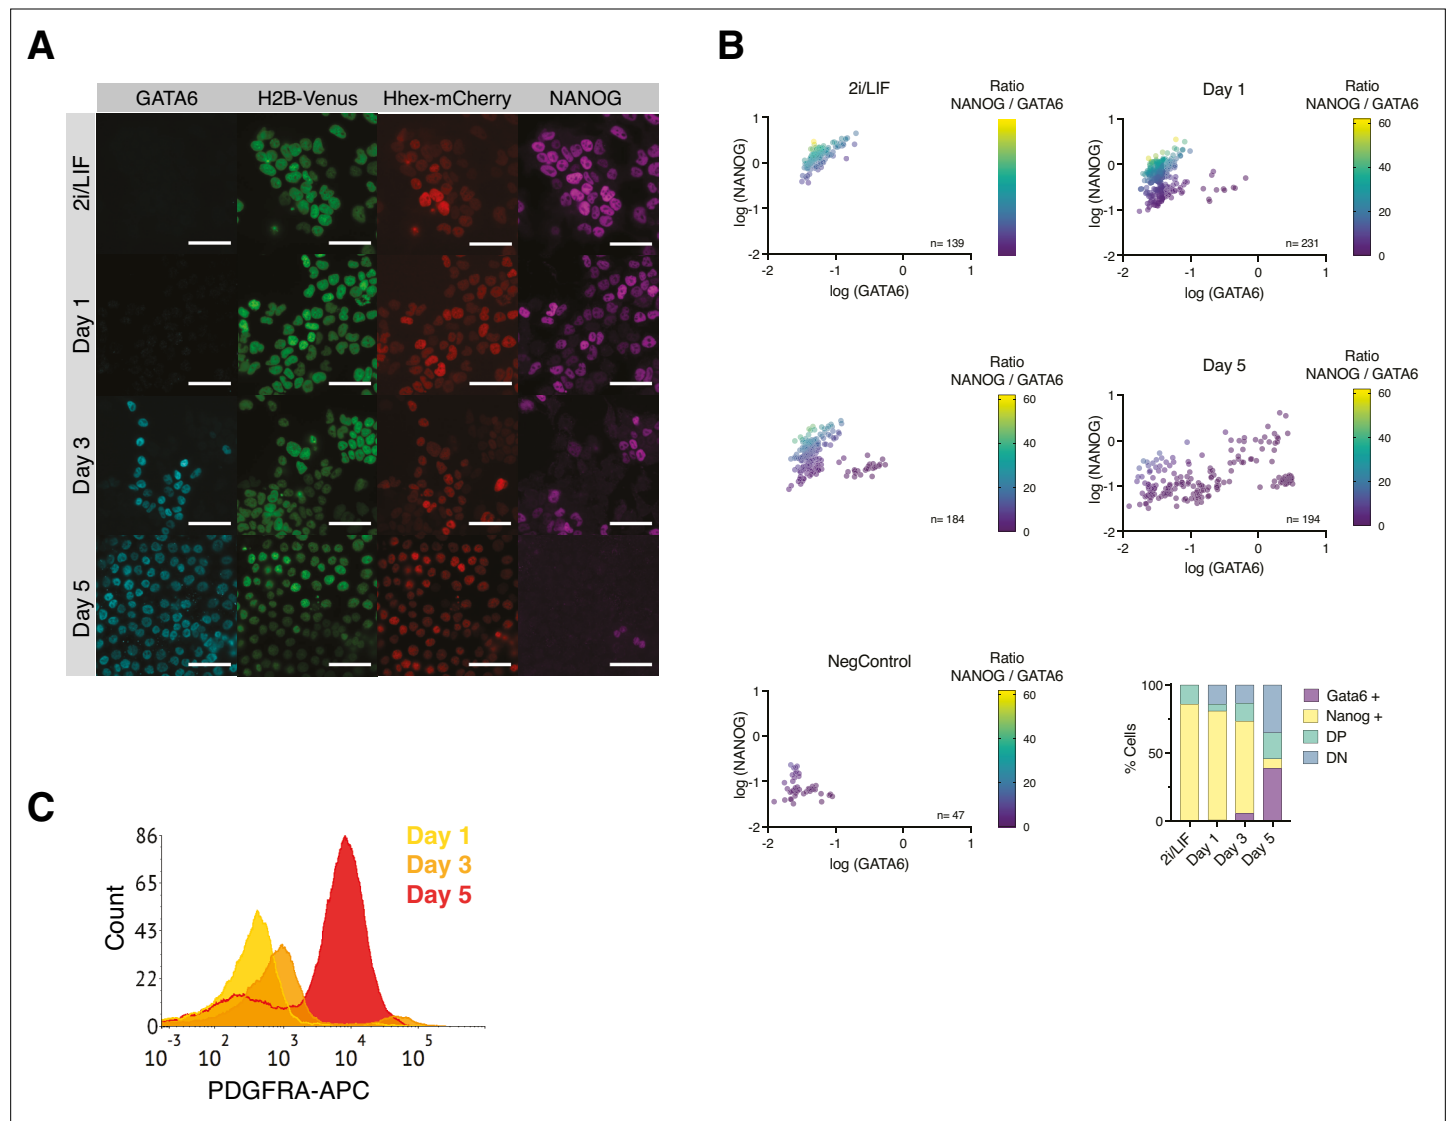

**Figure 2—figure supplement 2.** Assessing Primitive Endoderm (PrE) differentiation *in vitro* and *in silico*. **(A)** HFHCV mouse embryonic stem cells (mESCs) lost pluripotent identity (NANOG) and acquired endodermal identity (GATA6) during PrE differentiation. Scale bar: 50  $\mu$ m. **(B)** Quantification of immunofluorescent images obtained at the indicated time points. Cells were segmented based on 4',6-diamidino-2-phenylindole (DAPI) and GATA6 or NANOG fluorescent was measured in absolute units. Data were converted to log scale for easier visualization. Cells were quantified as NANOG positive, GATA6 positive, Double Positive (DP), and Double Negative (DN) using the thresholds from the Negative Control. **(C)** Flow cytometry histogram of HFHCV mESCs during PrE differentiation. PDGFRA-APC staining of HFHCV mESCs at days 1, 3, and 5 shows the acquisition of endodermal identity.

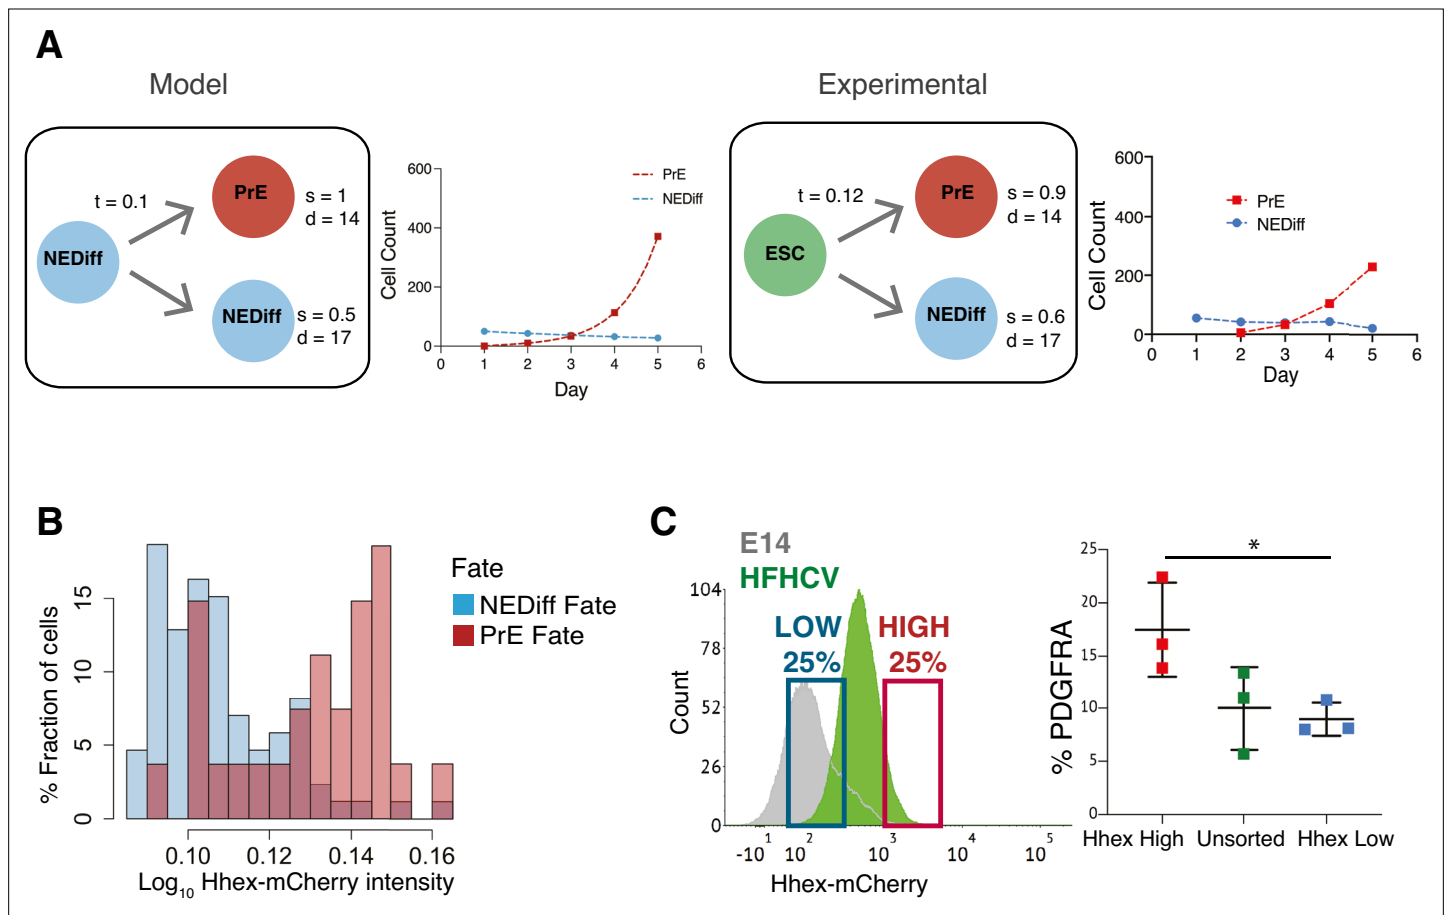

**Figure 3.** Analysis of Primitive Endoderm (PrE) progenitor cells demonstrates functional priming of Hhex-high cells. **(A)** A mathematical model that considers the difference in cell death rate between the two populations as well as the proliferation rate can recapitulate the PrE dataset collected (see Methods for description of the Mathematical Modelling). Based on the experimental dataset, we found the same survival rates predicted by the model.  $t$  = transition rate,  $s$  = survival rate,  $d$  = division time (hr). **(B)** The NEDiff cluster at day 2 was separated into cells that will give rise to PrE (PrE Fate), and cells that eventually would not differentiate (NEDiff Fate). Analysis of the *Hhex* intensity distribution shows that cells that will give rise to PrE (PrE Fate) show higher *Hhex* intensity. Total cell number and fluorescence quantification shown in **Table 3**. **(C)** The High *Hhex* population from day 2 of PrE differentiation, isolated by FACS, shows improved PrE differentiation (scored as percentage of PDGFRA-positive cells), demonstrating the functional priming of these cells. \* $p$  value  $<0.05$ , Kruskal–Wallis test.

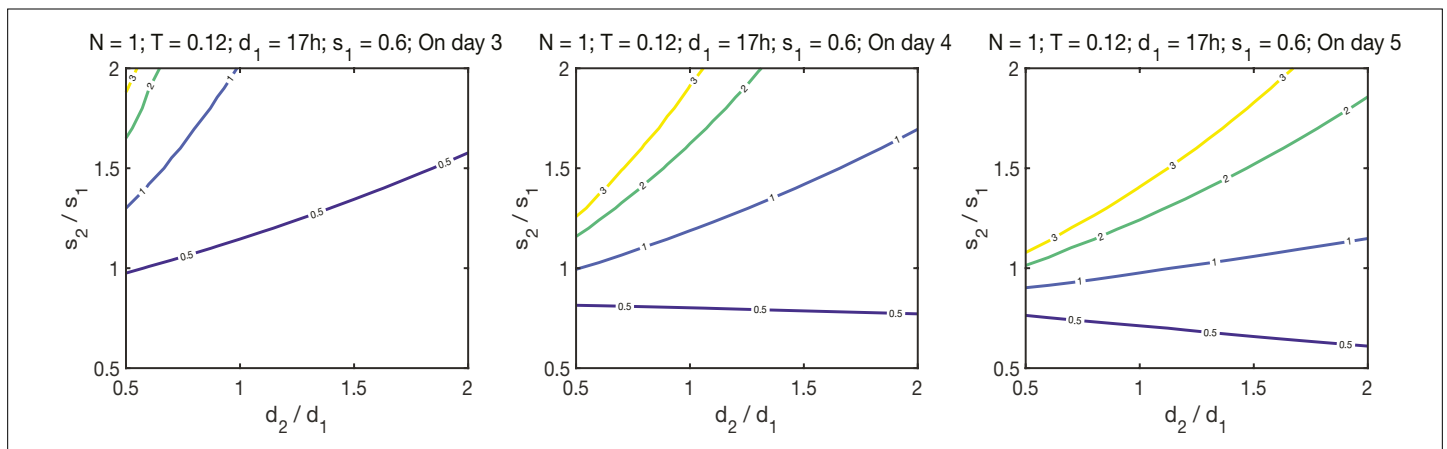

**Figure 3—figure supplement 1.** Algebraic model iterations. Phase diagrams based on the algebraic model (**Figure 3A**, Methods) illustrating how the differences in cell death and cell division influence the proportions of the Primitive Endoderm (PrE) and the NEDiff populations. Each line represents combinations of relative survival and proliferation rates that result in the same PrE/NEDiff ratio, the ratio is indicated by the numbers on each line.  $N$  is the initial cell number,  $t$  is the transition rate from NEDiff to PrE,  $d_1$  is the division rate of NEDiff population,  $d_2$  of the PrE population,  $s_1$  is the survival rate of the NEDiff population,  $s_2$  of the PrE population. Diagrams illustrate that changes in the survival rates have stronger impact on increasing the PrE/NEDiff ratio at day 5, compared to division times, whereas on day 3 the division time has a greater impact.

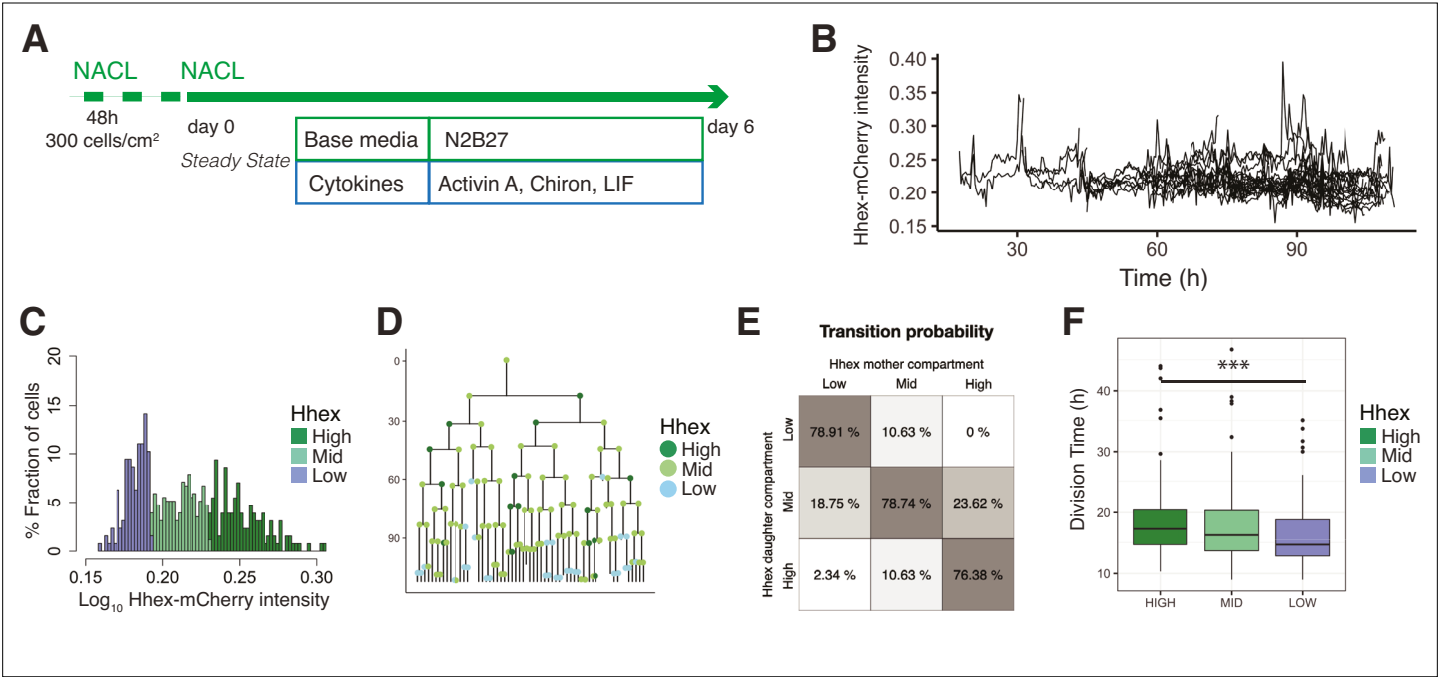

**Figure 4.** Single-cell quantification of *Hhex* expression in NACL uncovers a relationship between *Hhex* levels and cell cycle length. **(A)** Schematic of the experimental setup. Cells were plated 48 hr before starting the experiment. Cells were imaged for 6 days acquiring one time frame every 20 min. **(B)** Example of a cell trace (Time vs. *Hhex*-mCherry intensity) in the setup analysed. Cells survived and divided over 6 days without any apparent effect of cell death. Cells were entering and exiting higher and lower *Hhex* states without any apparent bias. **(C)** *Hhex* intensity distribution was divided into three compartments: High (includes cells above 75% percentile), Mid (between 25% and 75% percentiles), and Low (cells below 25% percentile). Y-Axis shows the percentage of cells that falls into each bin. See **Table 4** for total cell numbers per compartment. **(D)** Example of a lineage tree with the corresponding compartments of *Hhex*, by colour. The first and last generation were discarded from further analysis since the cell cycle information is not complete. All lineage trees collected in the NACL condition are shown in **Figure 4—figure supplement 2**. This example corresponds to Tree 1 in **Figure 4—figure supplement 2**. **(E)** Probability of cells to transition compartments between mother and daughter cells, quantified as percentage of cells over one generation. **(F)** The Low *Hhex* population divides significantly faster than the High *Hhex*. \*\*\*p value <0.001, Kruskal–Wallis test. The Mid *Hhex* population shows an in-between division time, suggesting a linear relationship between *Hhex* expression level and cell cycle length.



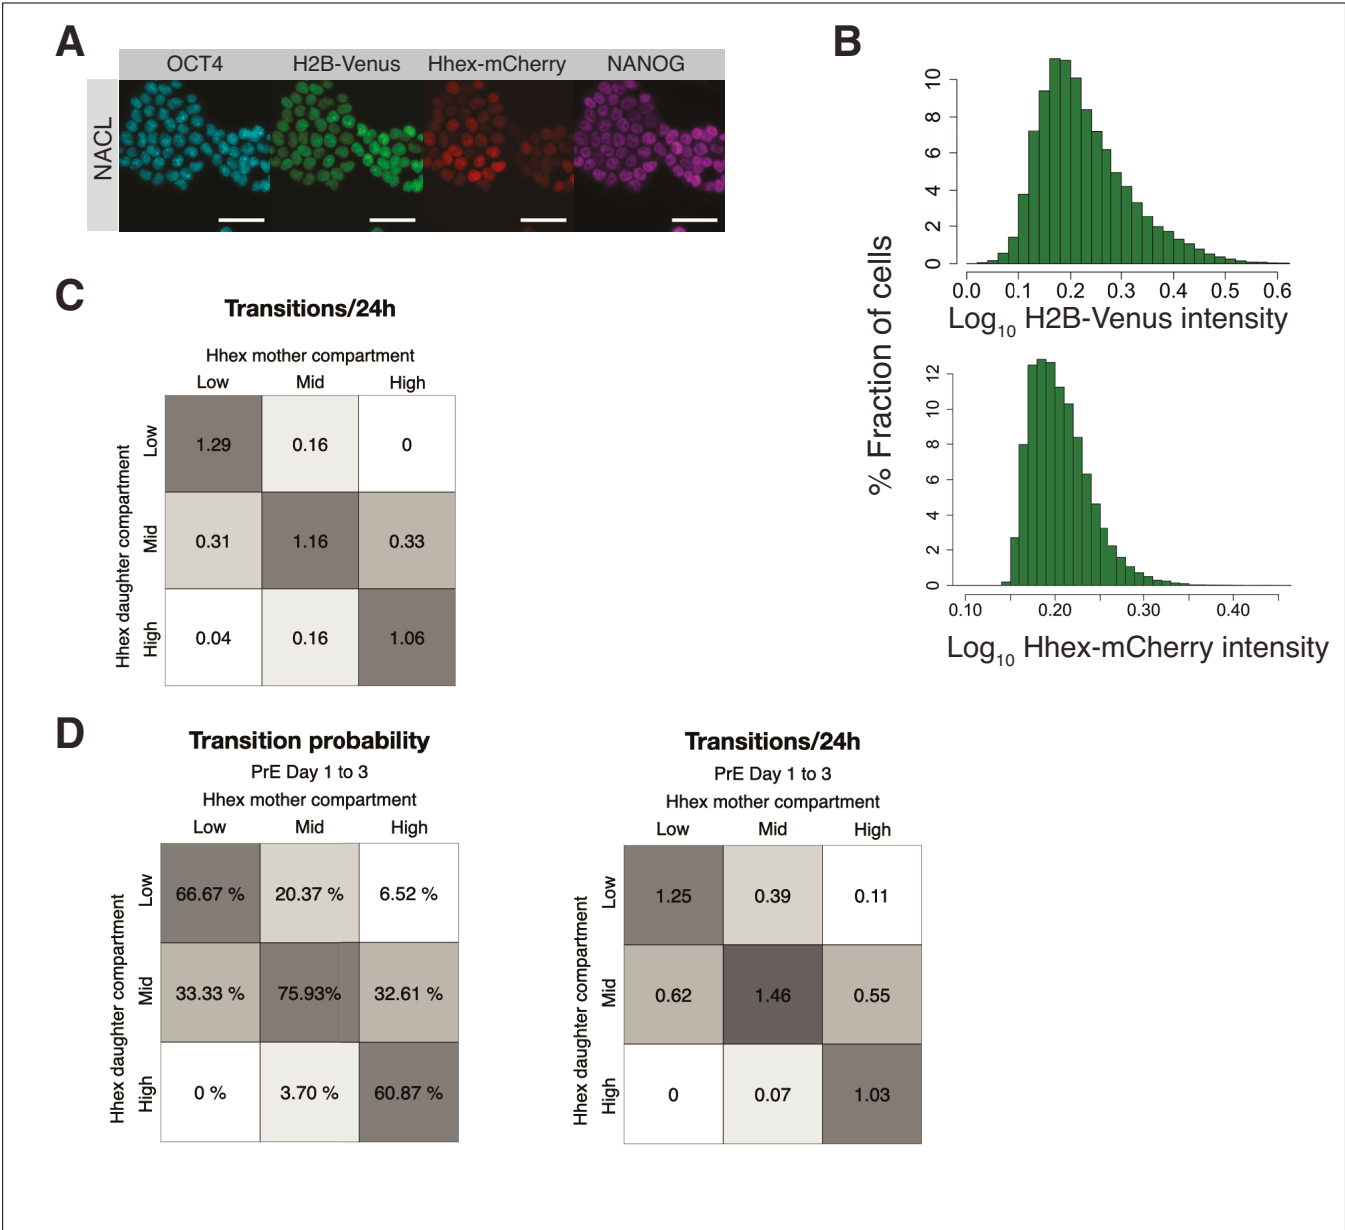

**Figure 4—figure supplement 1.** Heterogeneity in defined pluripotent stem cell culture. **(A)** HFHCV mouse embryonic stem cells (mESCs) maintained pluripotent identity after 6 days of time lapse, shown by OCT4 and NANOG immunostaining at the end of the experiment. Scale bar: 50  $\mu$ m. **(B)** Top: H2B-Venus intensity distribution for all data points collected in NACL. Not normal distribution, p value >0.05 in Shapiro–Wilk’s test. Bottom: Hhex-mCherry intensity distribution for all data points collected in NACL. Not normal distribution, p value >0.05 in Shapiro–Wilk’s test. **(C)** Number of transitions between Hhex compartments for each 24 hr of time lapse in NACL. **(D)** Left, transition probability for Hhex compartments during priming in early Primitive Endoderm (PrE) differentiation (days 1–3). Right, number of transitions between Hhex compartments for each 24 hr of time lapse in days 1–3 of PrE differentiation.

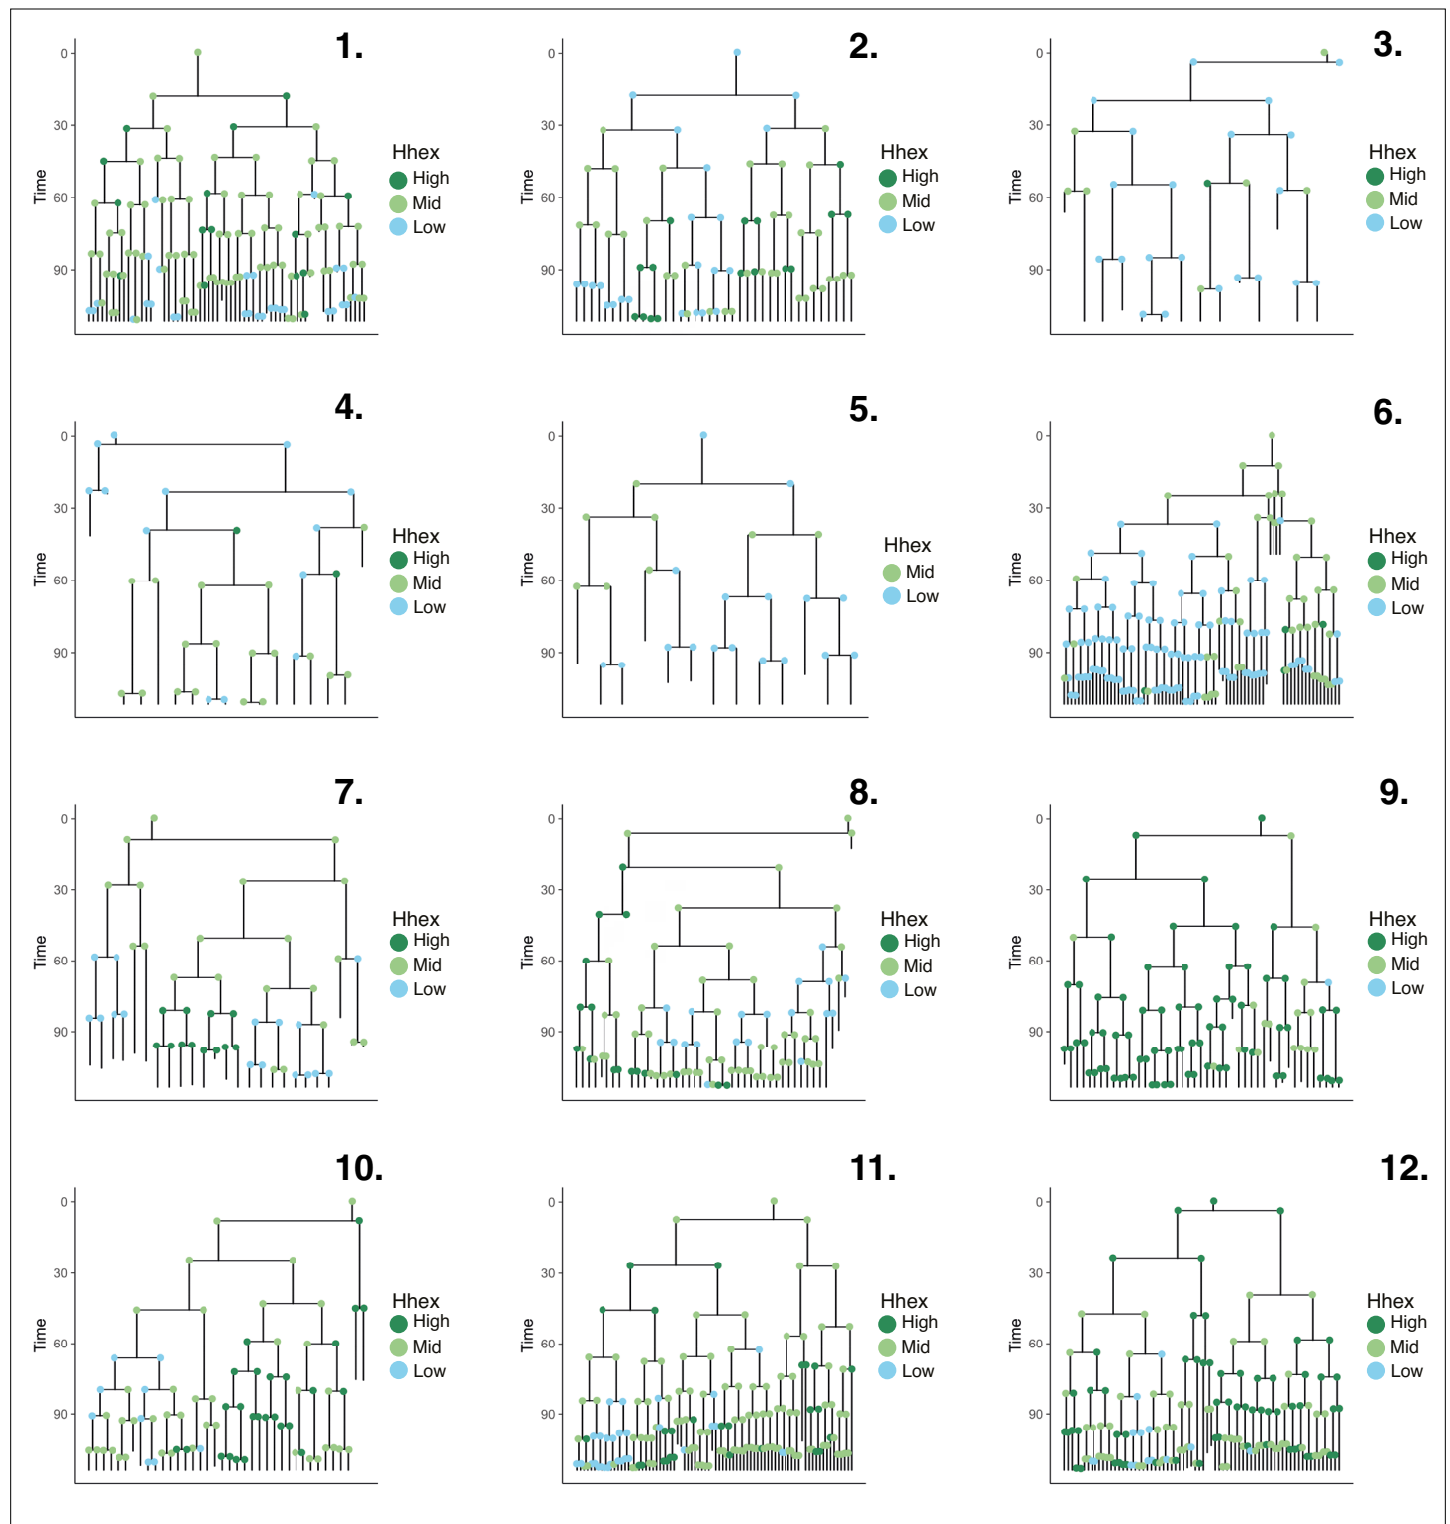

**Figure 4—figure supplement 2.** Lineage trees in pluripotent stem cell culture. Lineage trees generated in the NACL dataset. We manually tracked 1063 cells. After constructing our lineage trees, cells that died or that had not completed a full division cycle were discarded. The final dataset consisted of 509 cells across 12 lineage trees. Cells are coloured based on *Hhex* compartments described in **Figure 4C**.

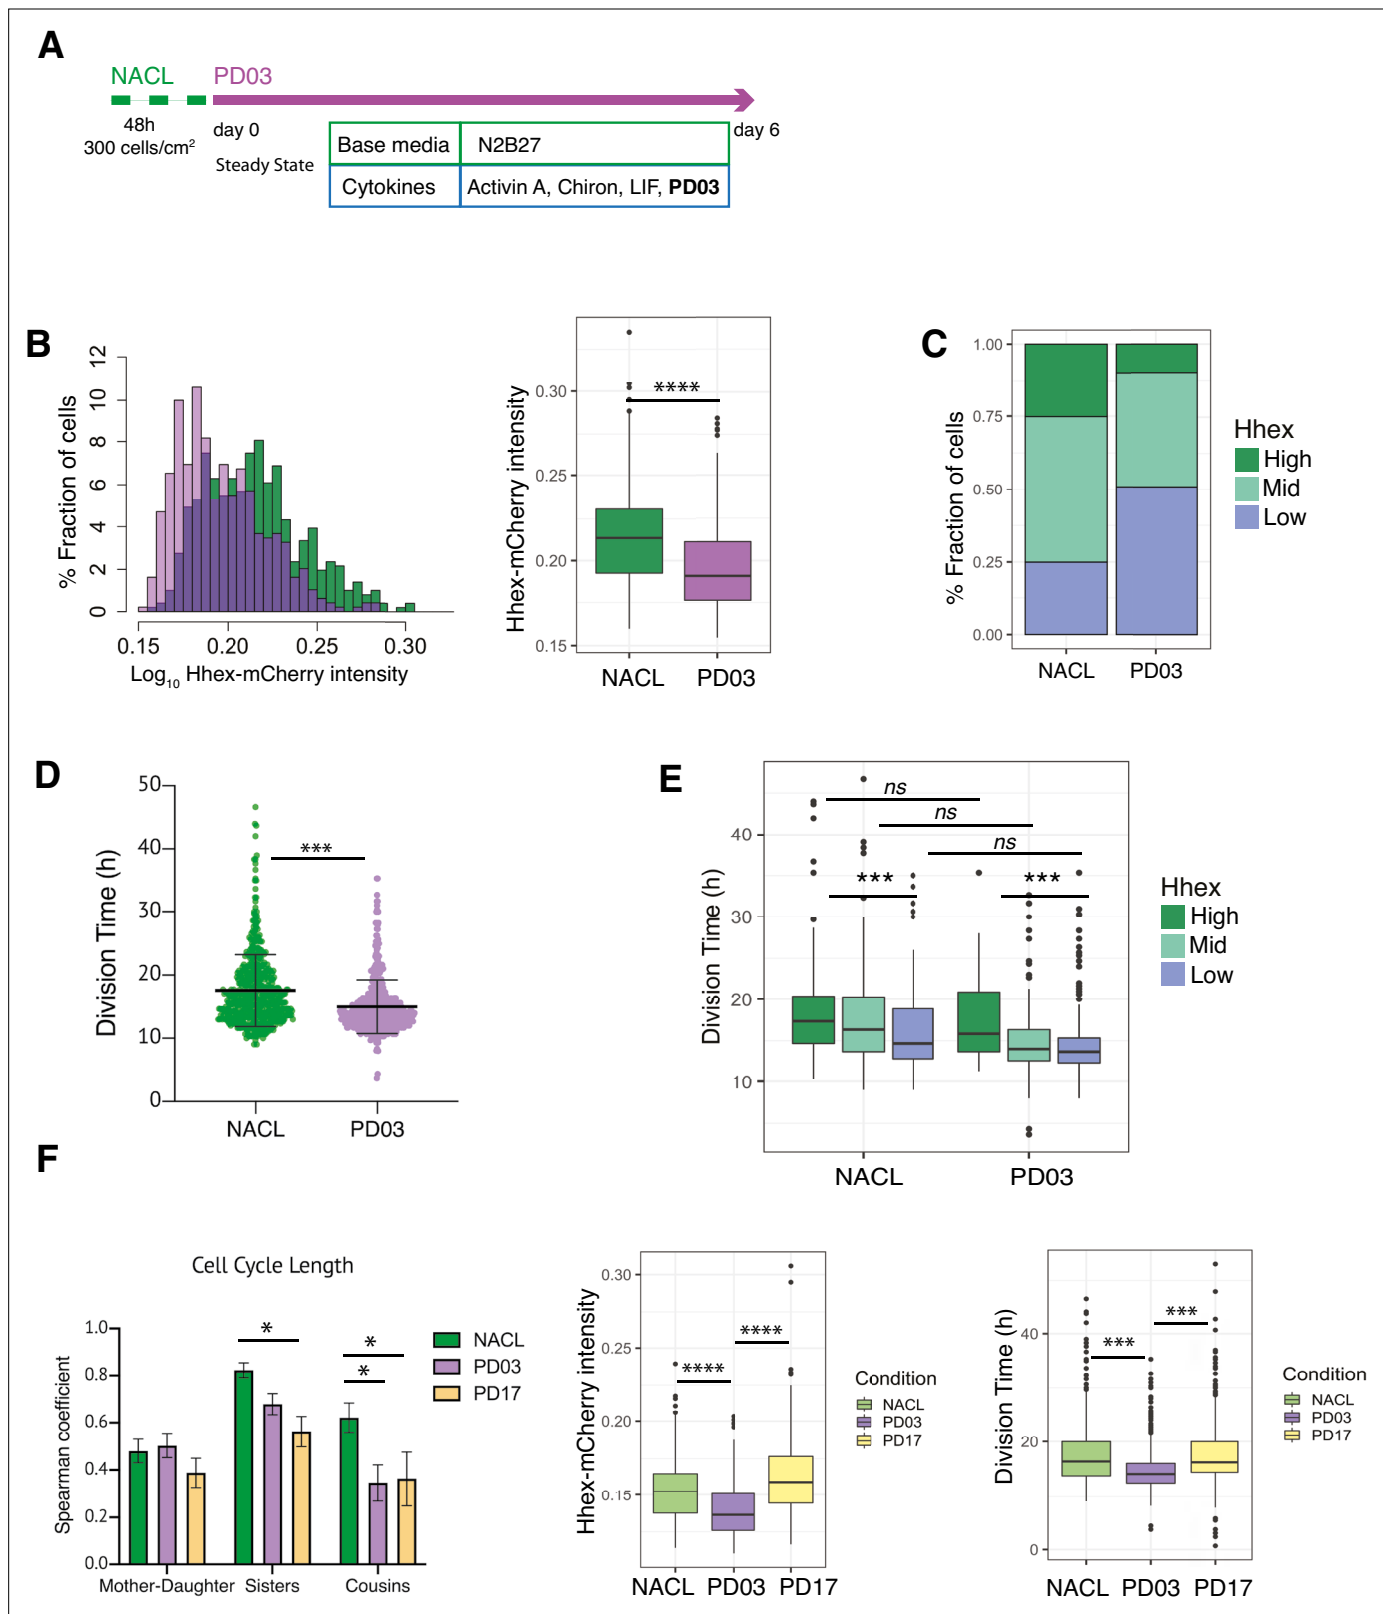

**Figure 5.** PD03 promotes expansion of the fast proliferating Low Hhex population. **(A)** Schematic of experimental setup. Cells were plated 48 hr before starting the experiment in NACL, and PD03 was added at the start of the time lapse. Cells were imaged for 6 days acquiring 1 time frame every 20 min. **(B)** Hhex intensity is significantly lower in the PD03 treated population. \*\*\*\*p value <0.0001, Wilcoxon test. **(C)** The lower intensity of Hhex is related to the higher fraction of cells in the Low Hhex population. The Low Hhex population increases from 25% to 50% when PD03 is added. **(D)**

Figure 5 continued on next page

*Figure 5 continued*

Mouse embryonic stem cells (mESCs) division time is significantly faster in PD03. \*\*\*p value <0.001, Mann–Whitney test. **(E)** Cell cycle in the Low Hhex compartment is faster in PD03 as well as in NACL. \*\*\*p value <0.001, Kruskal–Wallis test. **(F)** Left: Both PD03 and PD17 produce a loss in the cell cycle synchronization between sisters and cousins. All correlation plots are shown in **Figure 5—figure supplement 2**. \*p value <0.05. Right: PD17 does not provide the same alterations in *Hhex* expression or division time that were generated by PD03. \*\*\*p value <0.001, \*\*\*\*p value <0.0001.

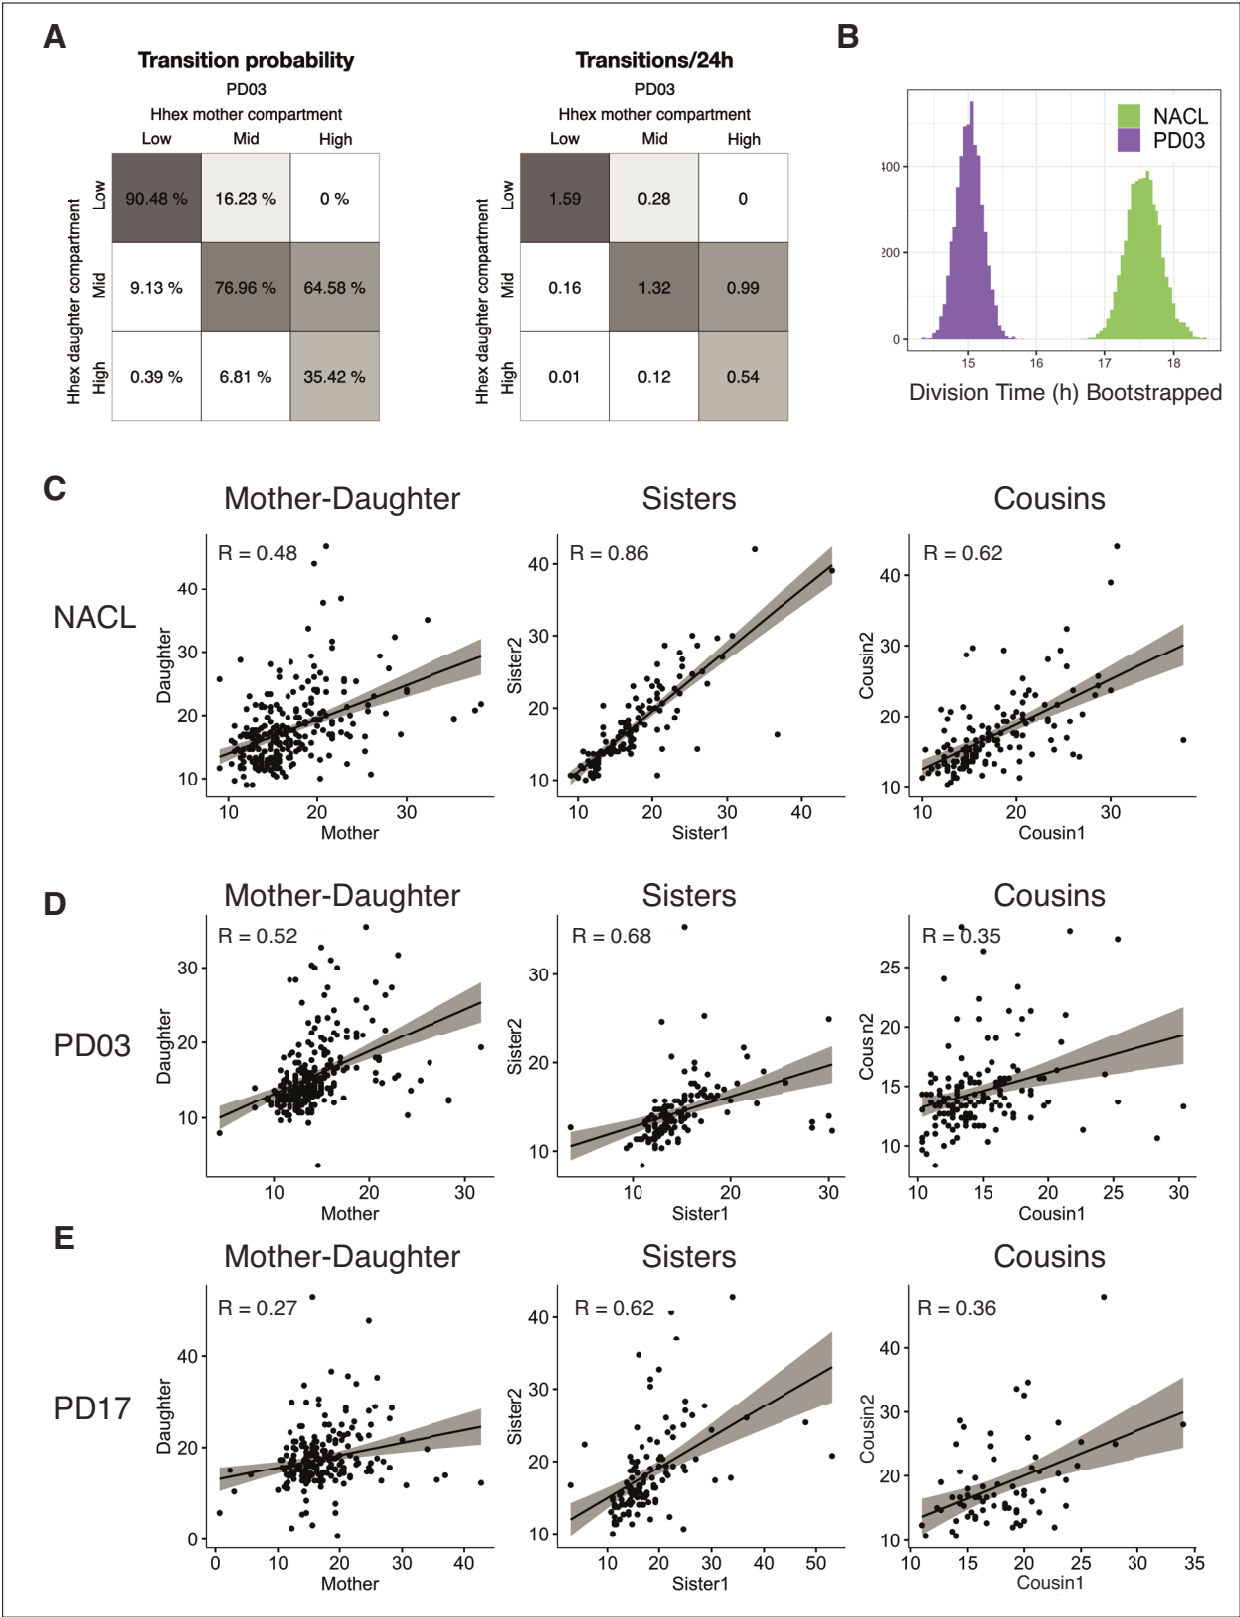

**Figure 5—figure supplement 1.** Lineage trees in pluripotent stem cell culture with PD03. Lineage trees generated in the PD03 dataset. We manually tracked 1000 cells. After constructing our lineage trees, cells that died or that had not completed a full division cycle were discarded. The final dataset consisted of 490 cells across 9 lineage trees. Cells are coloured based on *Hhex* compartments described in **Figure 4C**.

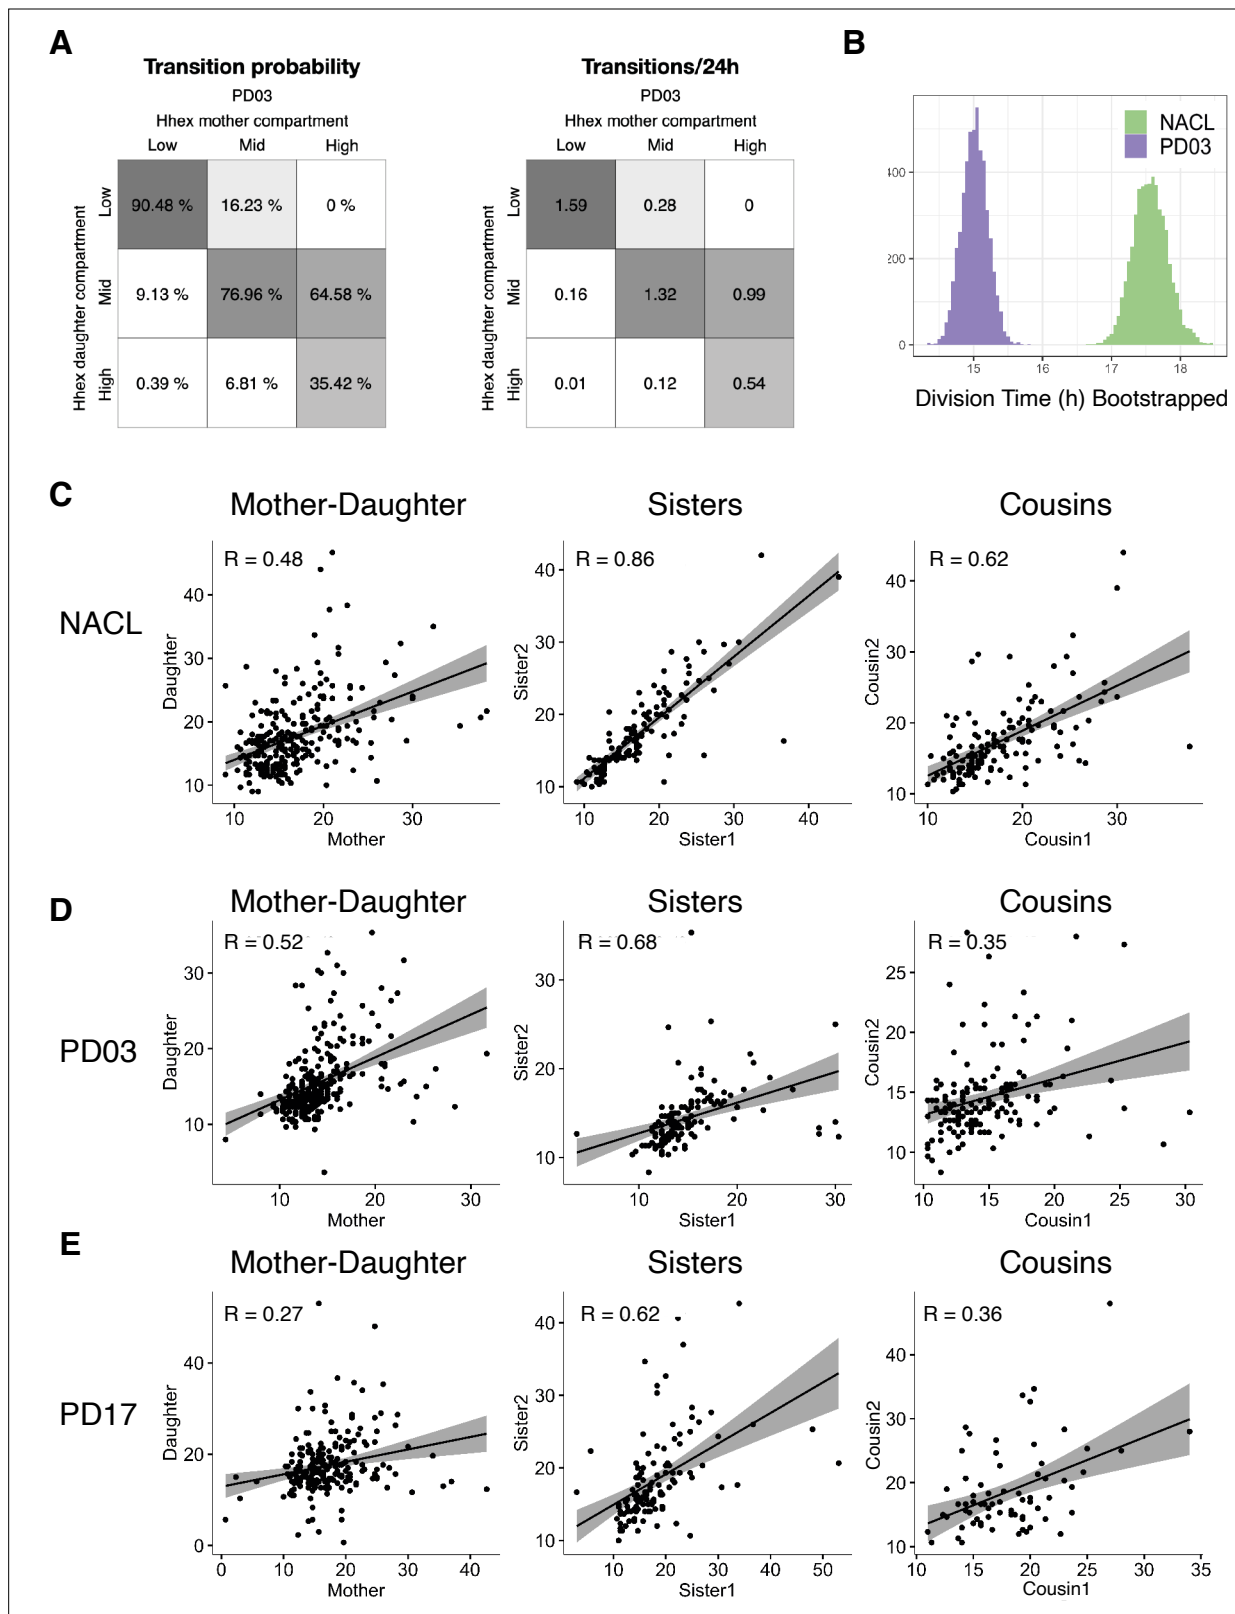

**Figure 5—figure supplement 2.** Transitions and cell cycle synchronization in response to FGF/ERK inhibition. **(A)** Percentage of cells that transition compartments between mother and daughter cells (left), and number of transitions/24 hr (right), in the PD03 dataset. **(B)** Bootstrap analysis (100 times) of the division time median, showing a clear difference between the NACL and PD03 dataset. **(C)** Spearman correlation plots for division times measurements in NACL. From left to right: Mother–daughter correlation, Sister pairs correlation, Cousin pairs correlation.  $R$ : Spearman correlation

Figure 5—figure supplement 2 continued on next page

*Figure 5—figure supplement 2 continued*

coefficient. **(D)** Spearman correlation plots for division times measurements in PD03. From left to right: Mother–daughter correlation, Sister pairs correlation, Cousin pairs correlation.  $R$ : Spearman correlation coefficient. **(E)** Spearman correlation plots for division times measurements in PD17. From left to right: Mother–daughter correlation, Sister pairs correlation, Cousin pairs correlation.  $R$ : Spearman correlation coefficient.

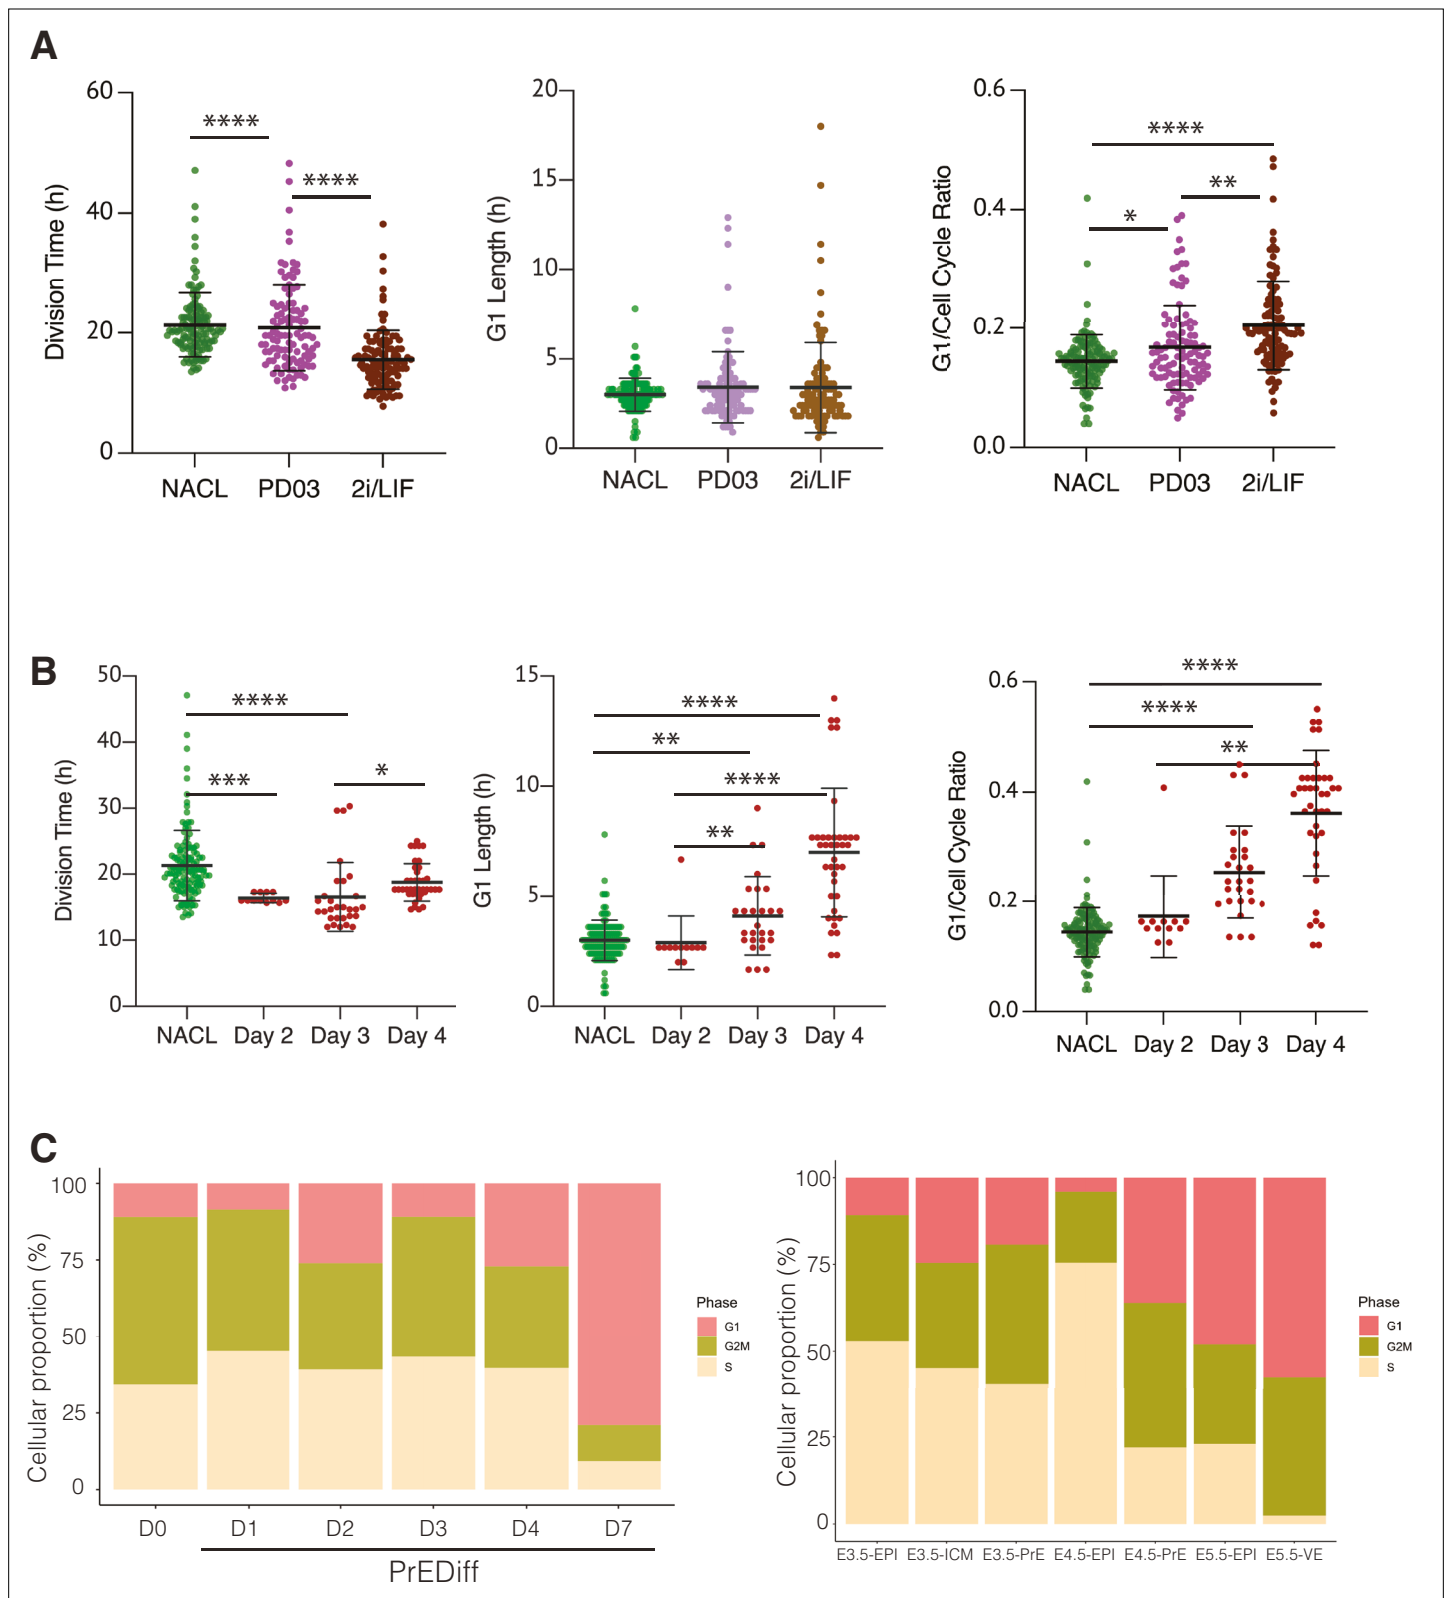

**Figure 6.** The regulation of cell cycle length during priming and differentiation involves G1 length. **(A)** PD03 addition significantly increases the ratio between G1 and division time (\*p value <0.05, Kruskal–Wallis test), even though it does not significantly change the G1 length itself in Fucci cells. Cells cultured in 2i/LIF for two passages show a faster cell cycle than when PD03 was added for a short period (\*\*p value <0.01, \*\*\*\*p value <0.0001, Kruskal–Wallis test). **(B)** Primitive Endoderm (PrE) differentiated cells show a longer G1 phase and an increase in G1 ratio as they proceed along the

Figure 6 continued on next page



*Figure 6 continued*

differentiation process. Division time is faster at day 3 and then it slows down, consistent with the previous dataset. \*p value <0.05, \*\*p value <0.01, \*\*\*p value <0.001, \*\*\*\*p value <0.0001, Kruskal–Wallis test. **(C)** Proportion of cells that express G1, G2/M, or S signature transcriptional profiles. Left: *In vitro* dataset (this study). Right: *In vivo* dataset (**Nowotschin et al., 2019**).

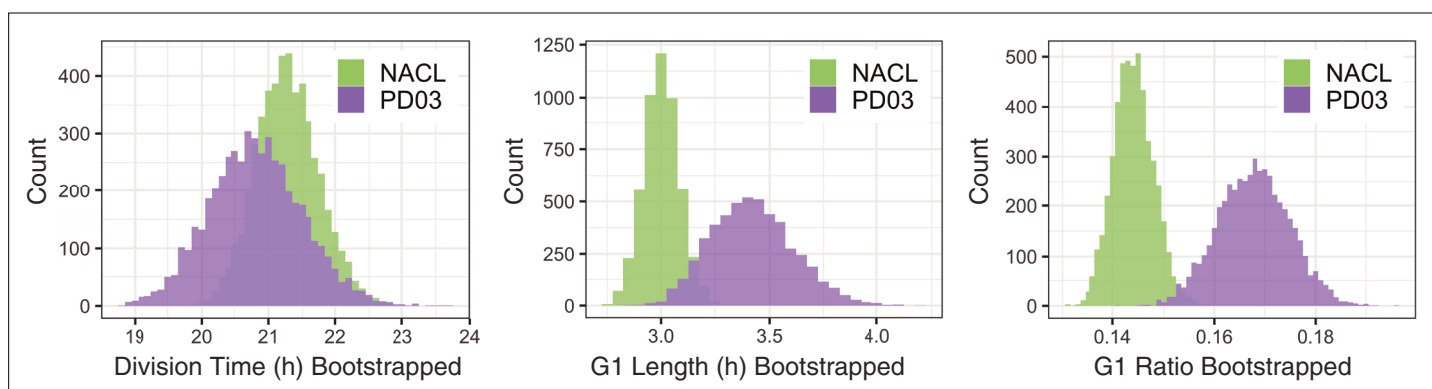

**Figure 6—figure supplement 1.** Bootstrap analysis of the FUCCI dataset. Bootstrap analysis (100 times) of division time, G1 length, and G1 ratio measured in the FUCCI cell line, showing a difference between the NACL and PD03 dataset.
